# Supplementary figures and images for: Validity of activity monitors in health and chronic disease: a systematic review
Source: Springer Nature journal article supplement (doi:10.1186/1479-5868-9-84), 2012-07-09

Electronic database searches Medline (n=1674), Embase (n=798) and Cinahl (n=403)

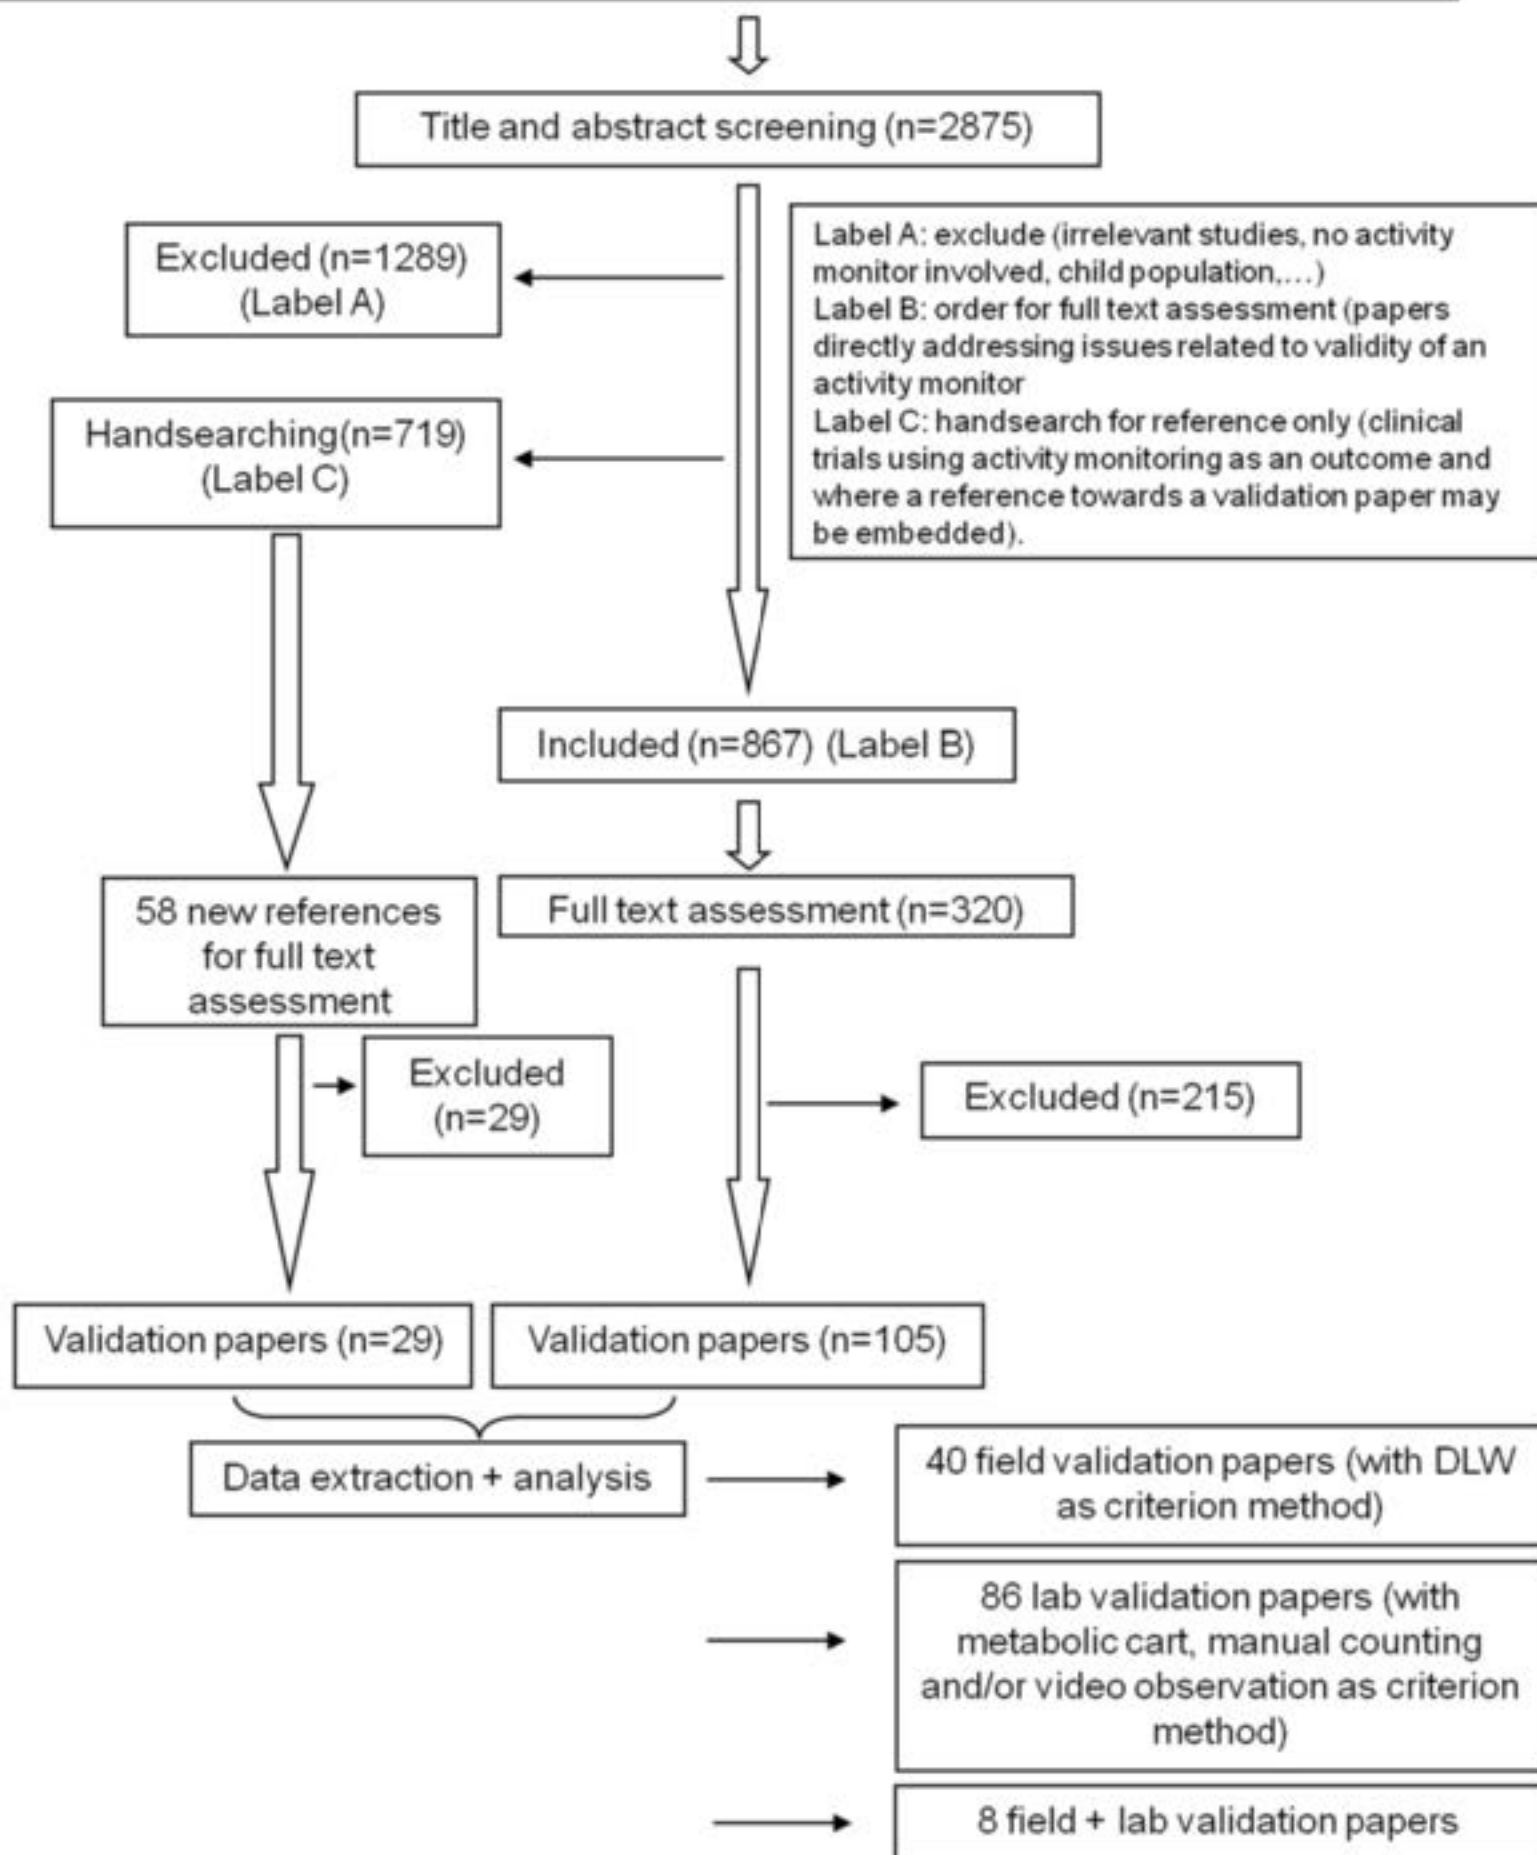

Supplement: 12966_2011_621_MOESM2_ESM.pdf [file 12966_2011_621_MOESM2_ESM.pdf]
